# Supplementary material for: Preparation of Zn2GeO4:Mn,In persistent luminescence nanoparticle composites for the detection of copper ions
Source: Royal Society of Chemistry journal article supplement (doi:10.1039/d4nj02764g), 2024-01-01
Supplement: d4nj02764g1.pdf [file d4nj02764g1.pdf]

## Electronic supplementary information

### Preparation of Zn<sub>2</sub>GeO<sub>4</sub>:Mn,In persistent luminescence nanoparticle composites for detection of copper ions

Yao-Xing Han<sup>a</sup>, Renagul Abdurahman<sup>a,\*</sup>, Shi-Ji Liu<sup>a</sup>, Xiu-Zhen Yang<sup>a</sup>, Yue Zhang<sup>a</sup>, Xuan-He Guo<sup>a</sup>, Rui Zhang<sup>a</sup>,  
Xing-Hong Pan<sup>a</sup>, Xue-Bo Yin<sup>b,\*</sup>

a. Xinjiang Key Laboratory of Novel Functional Materials Chemistry, College of Chemistry and Environmental Science, Kashi University, Kashi Xinjiang 844000 China.

\*E-mail: renagul111@aliyun.com

b. Institute for Frontier Medical Technology, College of Chemistry and Chemical Engineering, Shanghai University of Engineering Science, Shanghai, 201620 China.

\*E-mail: xbyin@nankai.edu.cn, xbyin@sues.edu.cn

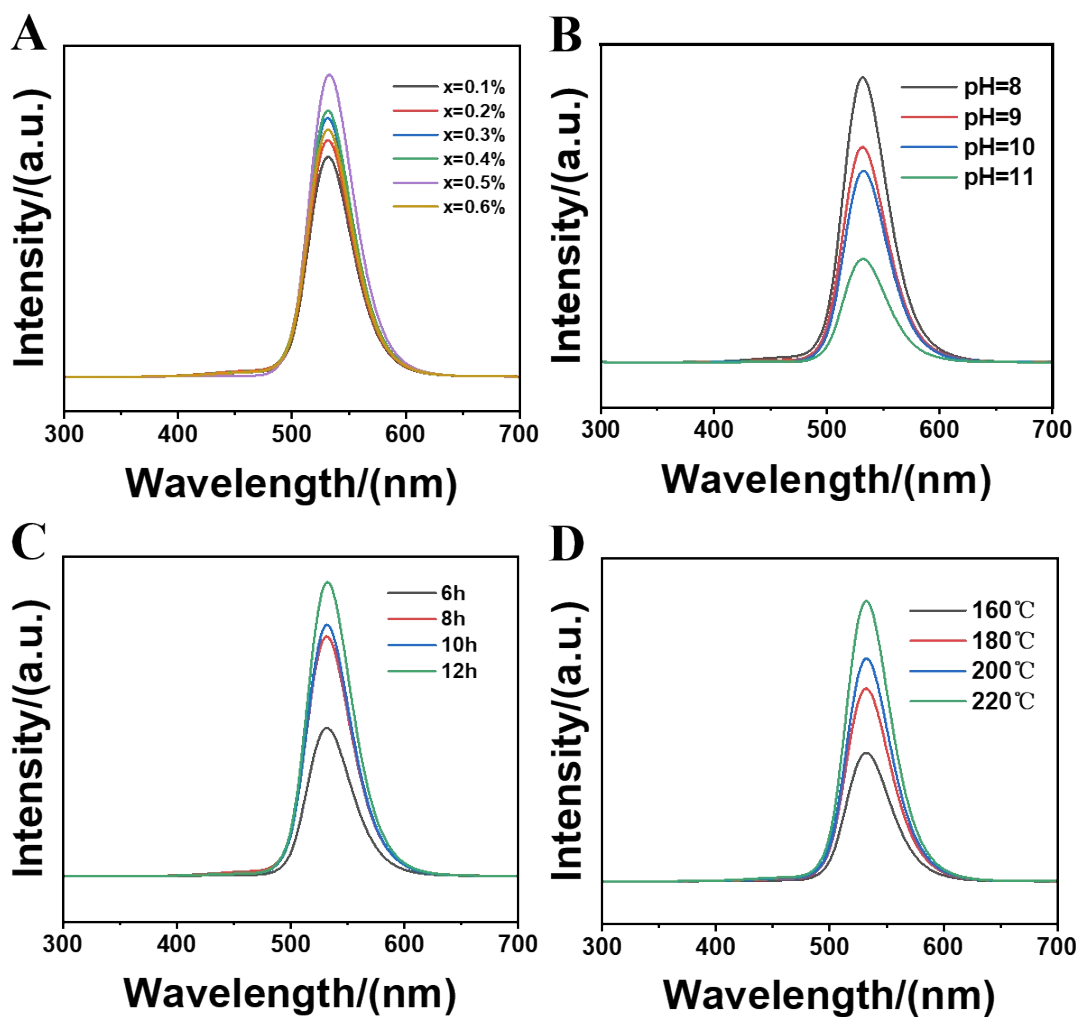

**Fig. S1** (A) Emission spectra of  $\text{Zn}_2\text{GeO}_4:x\text{Mn}^{2+}$ . (B) Emission spectra of  $\text{Zn}_2\text{GeO}_4: 0.5\% \text{Mn}^{2+}, y\text{In}^{3+}$  at different pH values. (C) Emission spectra of  $\text{Zn}_2\text{GeO}_4: 0.5\% \text{Mn}^{2+}, 0.3\% \text{In}^{3+}$  at different reaction times. (D) Emission spectra of  $\text{Zn}_2\text{GeO}_4: 0.5\% \text{Mn}^{2+}, 0.3\% \text{In}^{3+}$  at different reaction temperatures.

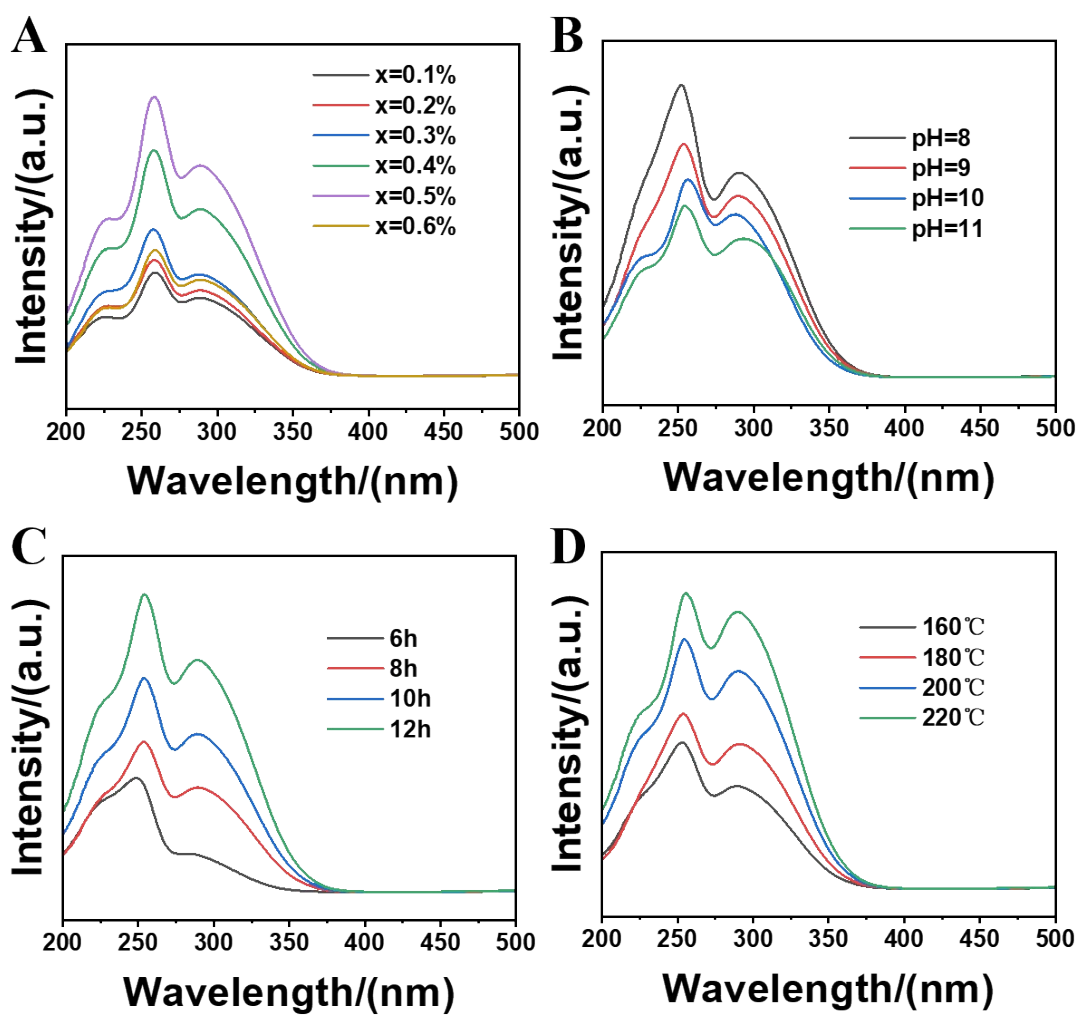

**Fig. S2** (A) Excitation spectra of  $\text{Zn}_2\text{GeO}_4: x\text{Mn}^{2+}$ . (B) Excitation spectra of  $\text{Zn}_2\text{GeO}_4: 0.5\% \text{Mn}^{2+}, 0.3\% \text{In}^{3+}$  at different pH values. (C) Excitation spectra of  $\text{Zn}_2\text{GeO}_4: 0.5\% \text{Mn}^{2+}, 0.3\% \text{In}^{3+}$  at different reaction times. (D) Excitation spectra of  $\text{Zn}_2\text{GeO}_4: 0.5\% \text{Mn}^{2+}, 0.3\% \text{In}^{3+}$  at different reaction temperatures.

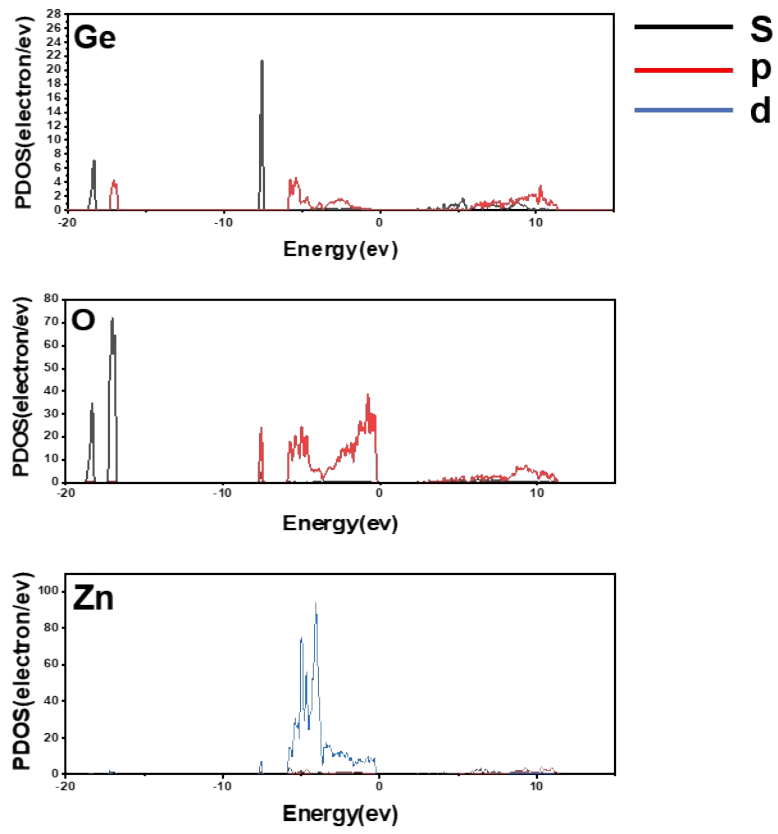

Fig. S3 PDOS of Zn<sub>2</sub>GeO<sub>4</sub>.

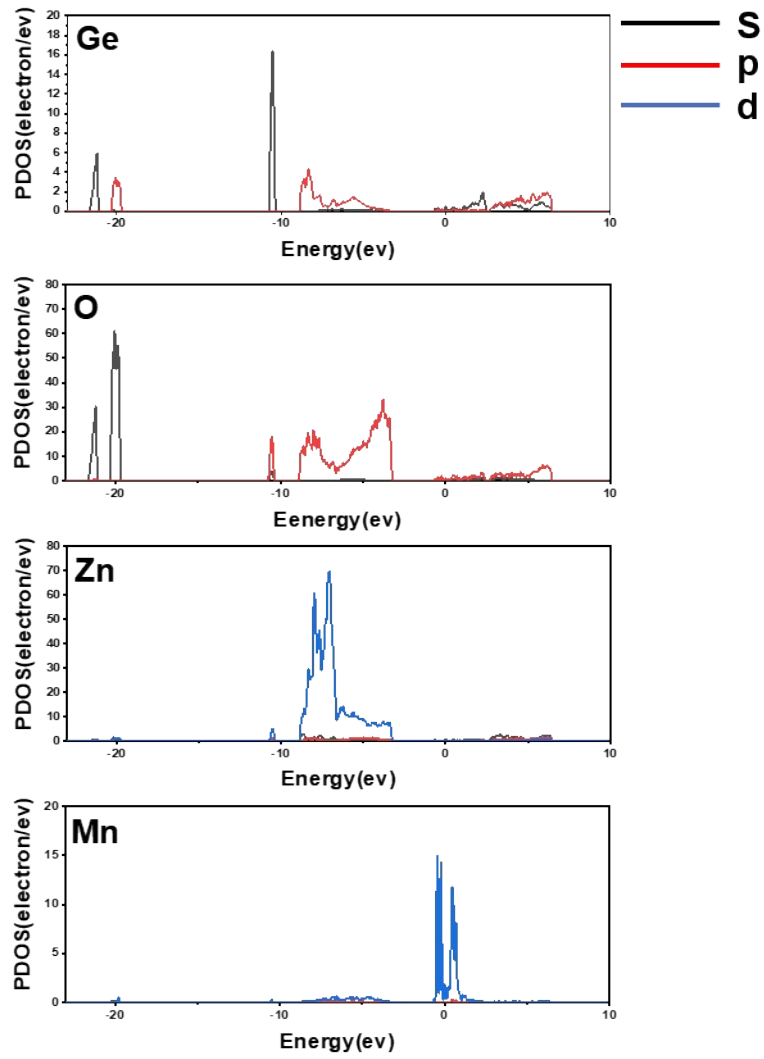

Fig. S4 PDOS of Zn<sub>2</sub>GeO<sub>4</sub>: Mn<sup>2+</sup>.

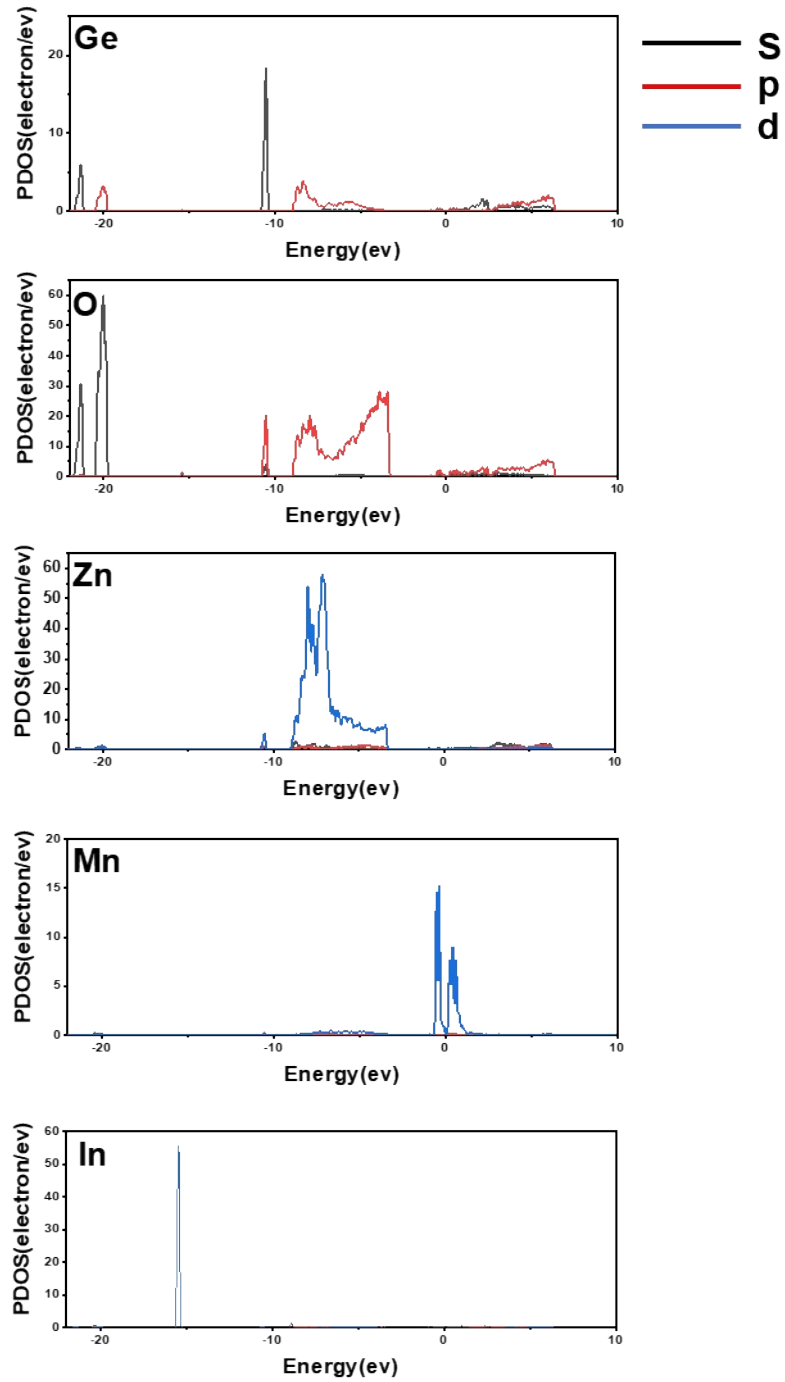

Fig. S5 PDOS of  $\text{Zn}_2\text{GeO}_4$ :  $\text{Mn}^{2+}$ ,  $\text{In}^{3+}$ .

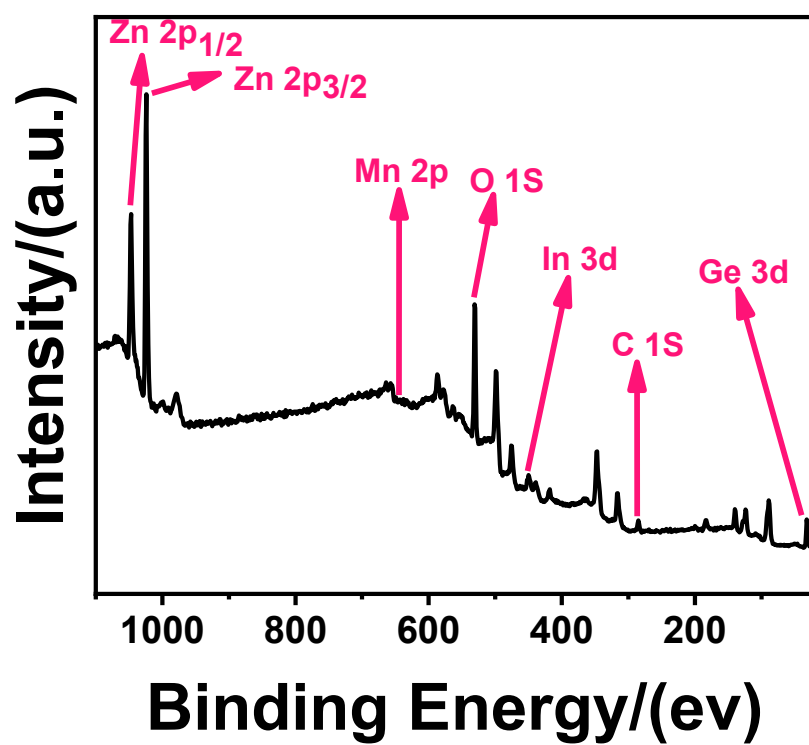

Fig. S6 XPS full spectrum of  $\text{Zn}_2\text{GeO}_4$ : 0.5%  $\text{Mn}^{2+}$ 、0.3%  $\text{In}^{3+}$ .

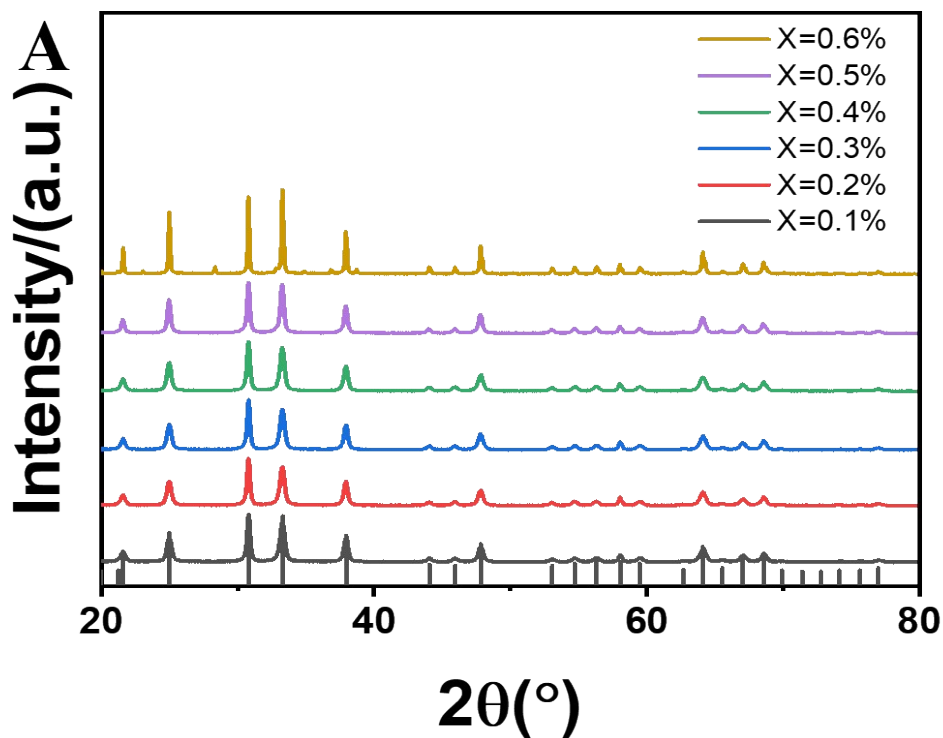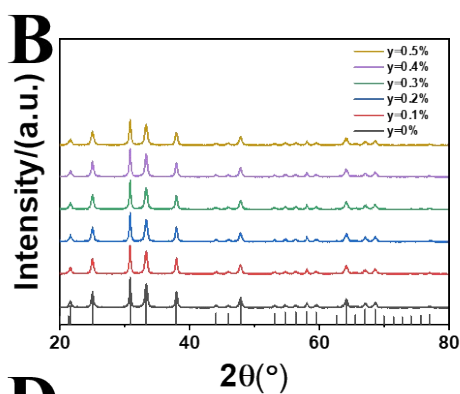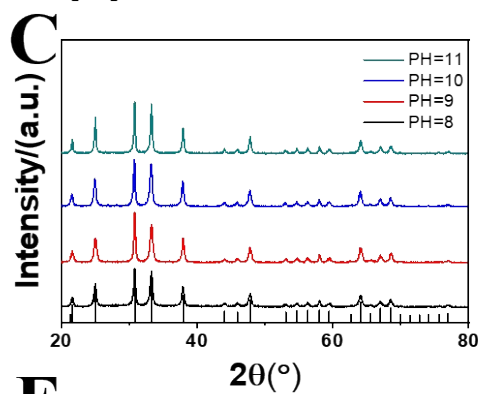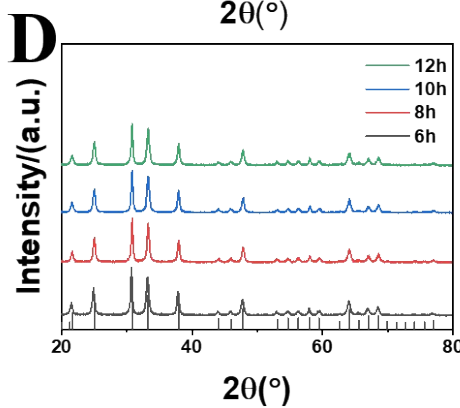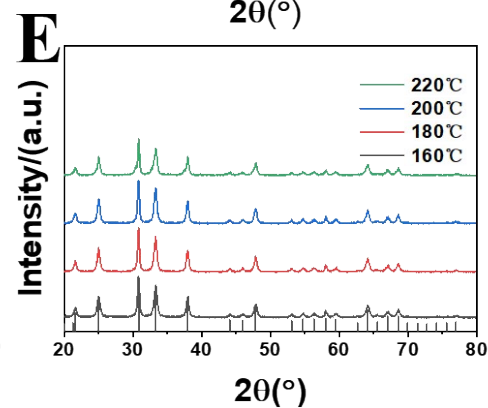

**Fig. S7** (A)  $\text{Zn}_2\text{GeO}_4: x\text{Mn}^{2+}$  XRD diagram. (B)  $\text{Zn}_2\text{GeO}_4: 0.5\% \text{Mn}^{2+}, \text{YIn}^{3+}$  XRD diagram. (C) XRD diagram of  $\text{Zn}_2\text{GeO}_4: 0.5\% \text{Mn}^{2+}, 0.3\% \text{In}^{3+}$  pH optimized. (D) XRD diagram of  $\text{Zn}_2\text{GeO}_4: 0.5\% \text{Mn}^{2+}, 0.3\% \text{In}^{3+}$  hydrothermal time optimization. (E) XRD diagram of  $\text{Zn}_2\text{GeO}_4: 0.5\% \text{Mn}^{2+}, 0.3\% \text{In}^{3+}$  optimized for hydrothermal temperature.



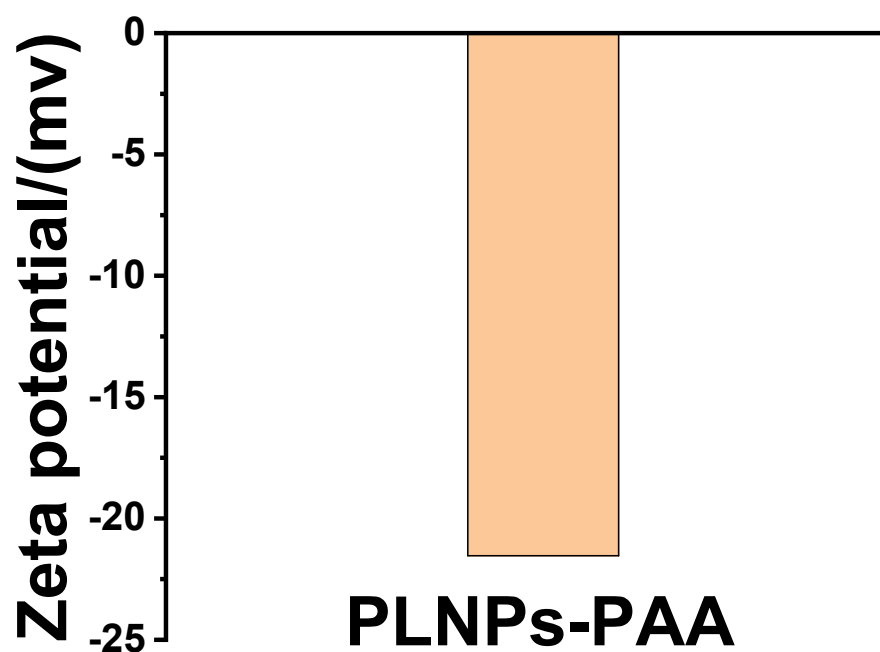

Fig. S8 Zeta potential map of PLNPs-PAA.

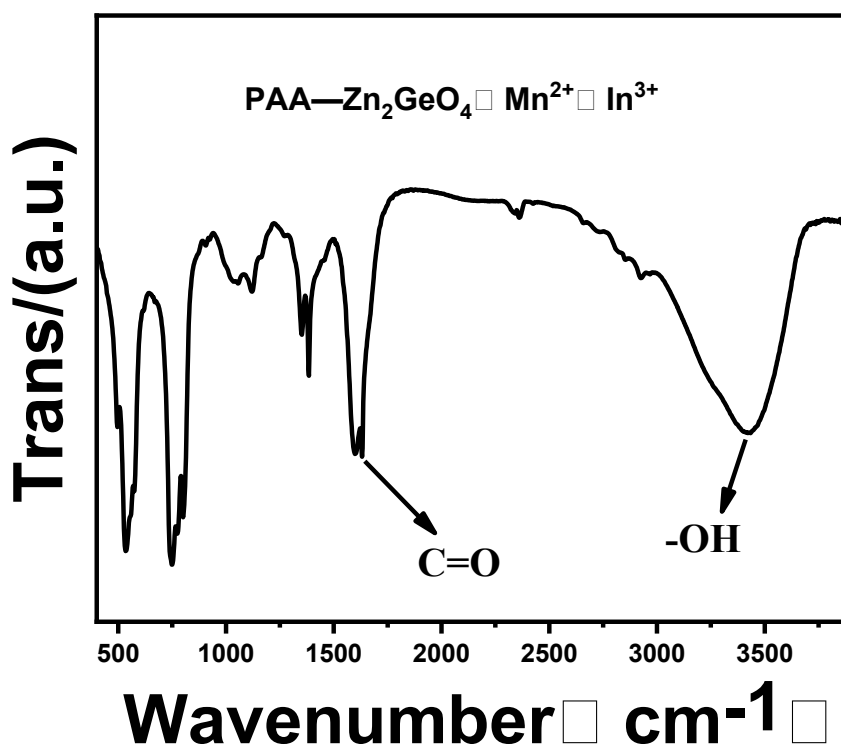

Fig. S9 Infrared map of PLNPs-PAA.
